# Supplementary material for: Loss of cIAP1 in Endothelial Cells Limits Metastatic Extravasation through Tumor-Derived Lymphotoxin Alpha
Source: MDPI journal article supplement (doi:10.3390/cancers13040599), 2021-02-03
Supplement: s1 [file s1]

# Loss of cIAP1 in Endothelial Cells Limits Metastatic Extravasation through Tumor-Derived Lymphotoxin Alpha

Lazaros Vasilikos, Kay Hänggi, Lisanne M. Spilgies, Samanta Kisele, Stefanie Rufli and W. Wei-Lynn Wong

**Citation:** Vasilikos, L.; Hänggi, K.; Spilgies, L.M.; Kisele, S.; Rufli, S.; Wong, W. W.-L. Loss of cIAP1 in Endothelial Cells Limits Metastatic Extravasation through Tumor-Derived Lymphotoxin Alpha. *Cancers* **2021**, *13*, 599. <https://doi.org/10.3390/cancers13040599>  
Academic Editor: Lisa M. Sedger, Heinrich Korner

Received: 24 December 2020  
Accepted: 29 January 2021  
Published: 3 February 2021

**Publisher's Note:** MDPI stays neutral with regard to jurisdictional claims in published maps and institutional affiliations.

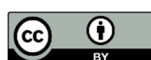

**Copyright:** © 2021 by the authors. Licensee MDPI, Basel, Switzerland. This article is an open access article distributed under the terms and conditions of the Creative Commons Attribution (CC BY) license (<http://creativecommons.org/licenses/by/4.0/>).

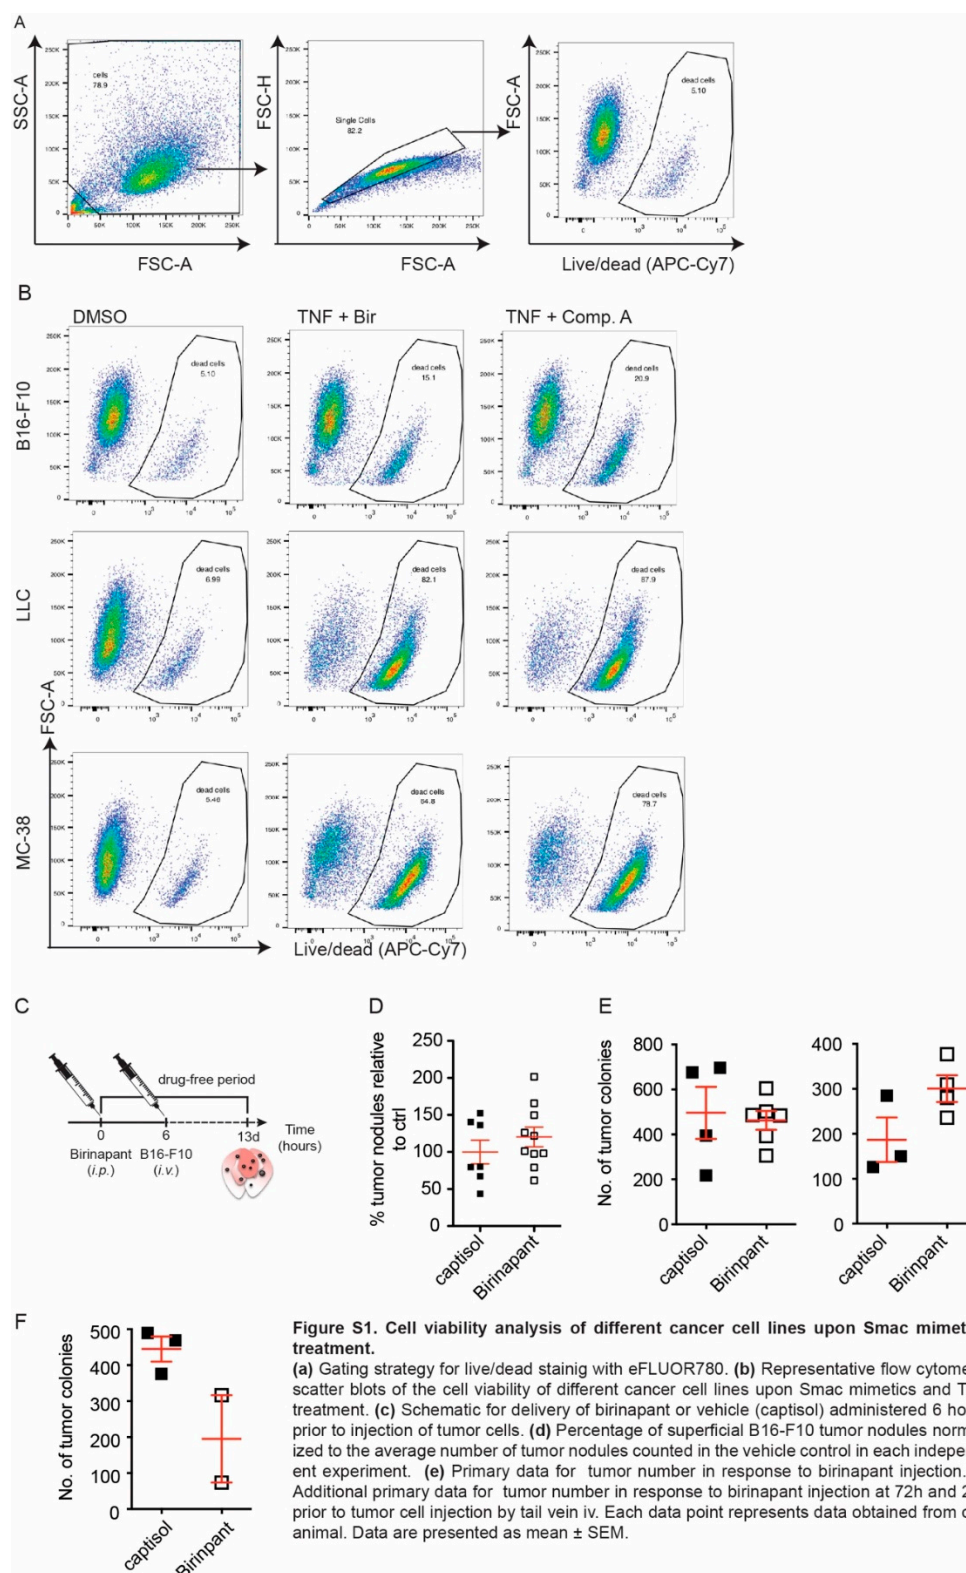

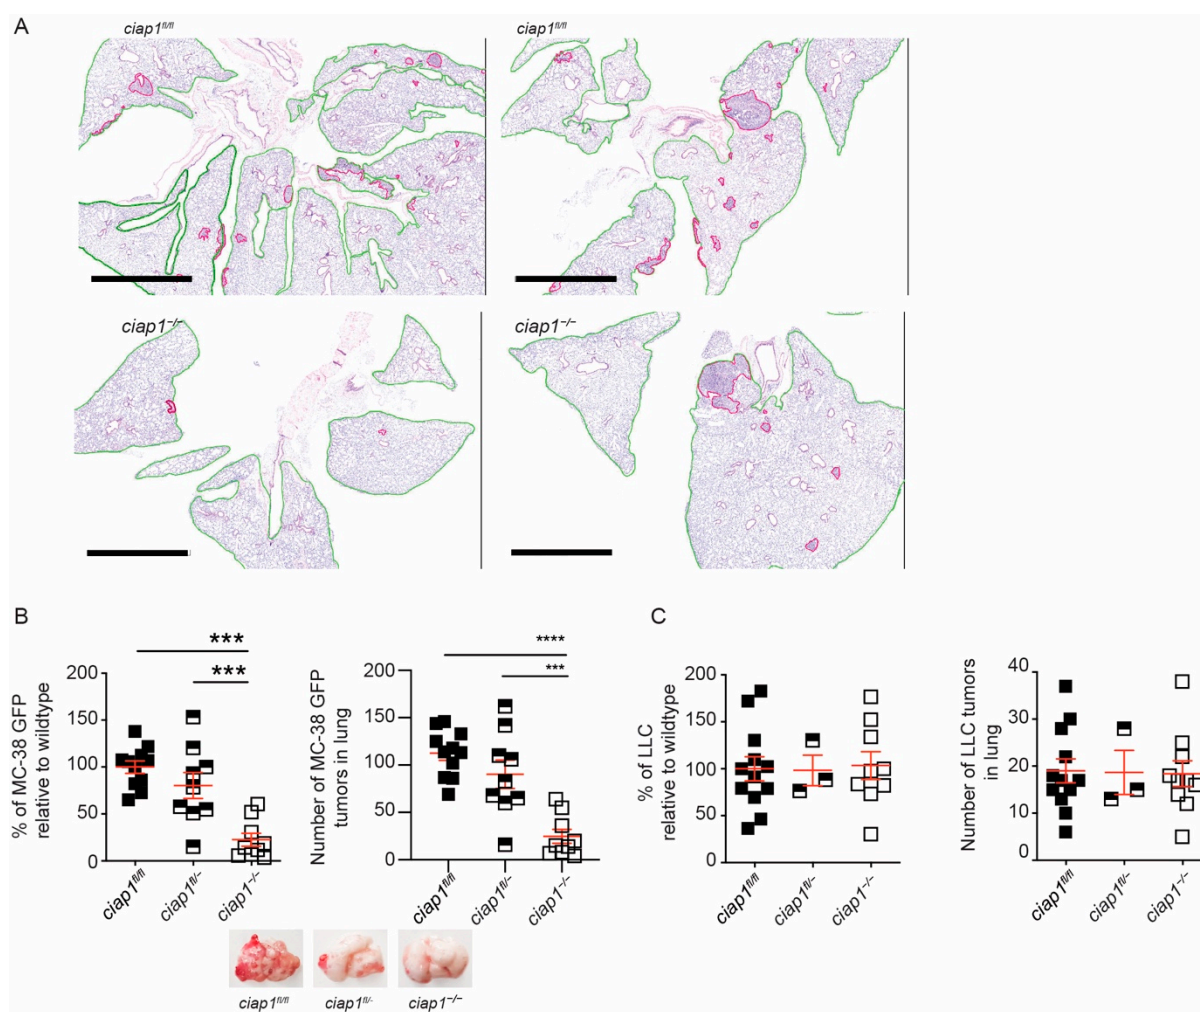

**Figure S2. Tumor cells are preferentially reduced in lungs of *ciAP1<sup>-/-</sup>* mice but not due to immune rejection.**

(a) Representative H&E histology of lungs from *ciAP1<sup>fl/m</sup>* and *ciAP1<sup>-/-</sup>* post 13 days injection of B16-F10 after segmentation. Lung tissue is outlined in green, tumor tissue is outlined in pink. (b) MC-38 GFP tumor cells were injected *i.v.* and nodules formed in the lung were counted 21 days later. Percentage of superficial MC-38 GFP tumor nodules normalized to the average of the wt control. Primary tumor nodule counts are also shown. (c) Percentage of superficial LLC tumor nodules normalized to the average of the wt control. Tumor cells were injected *i.v.* and nodules formed in the lung were counted 21 days later. Primary tumor nodule counts are also shown. Each data point represents an individual mouse. One way ANOVA with Bonferroni's test. (c). Data are presented as mean  $\pm$  SEM. \* $p < 0.05$ ; \*\* $p < 0.01$ ; \*\*\* $p < 0.001$ , ns = not significant.

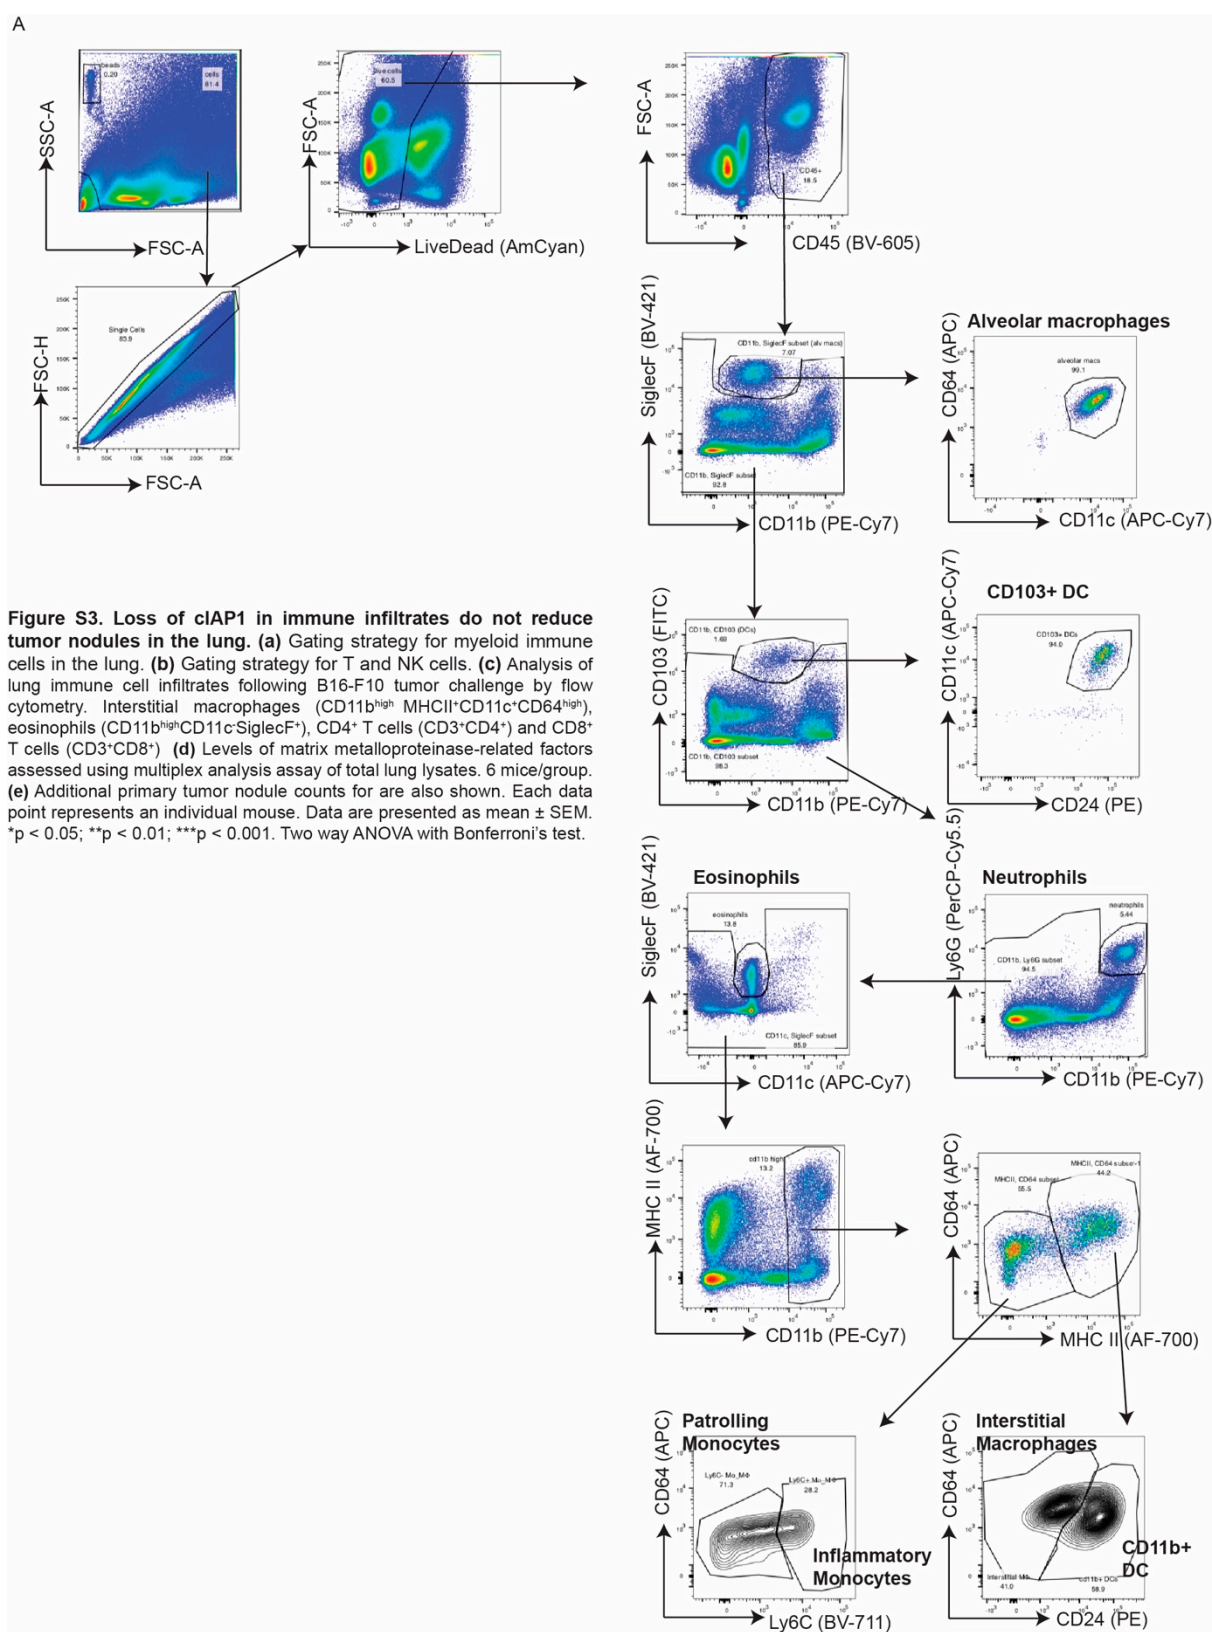



Figure S3 (cont).

B

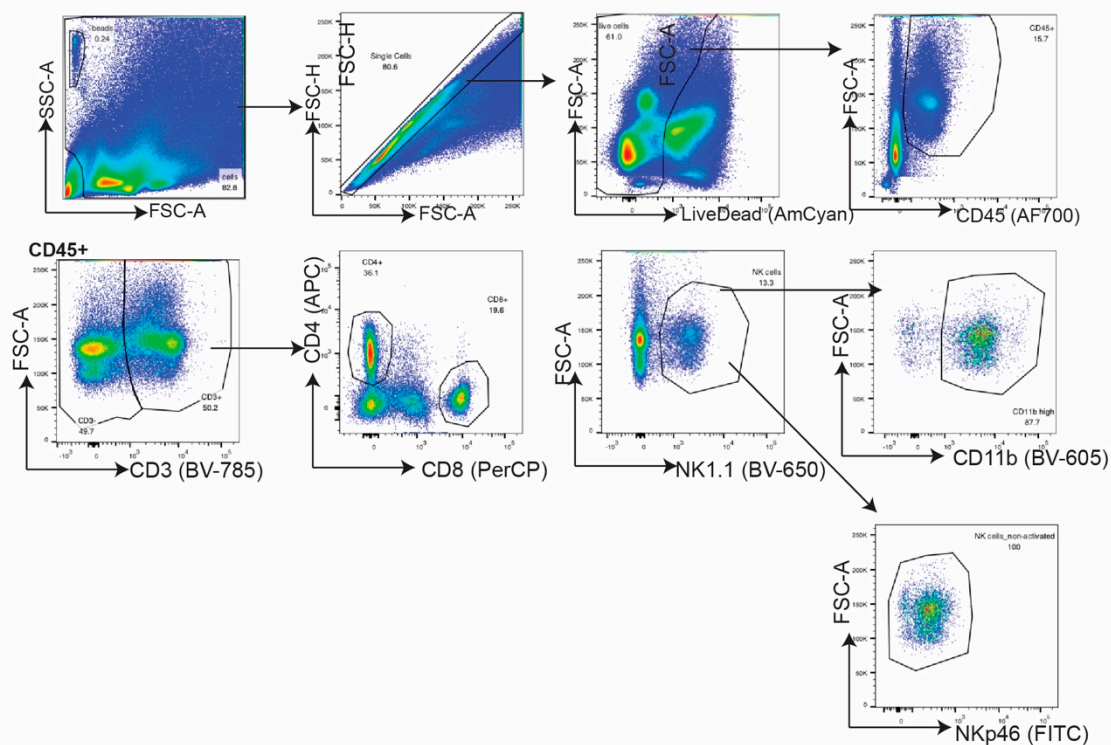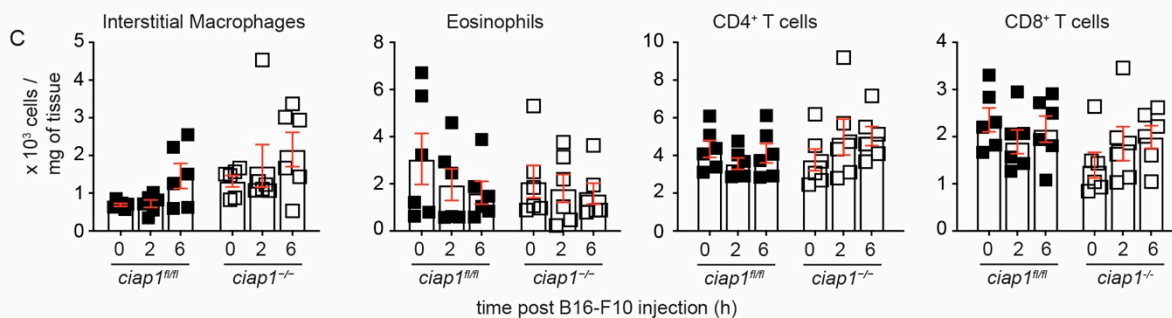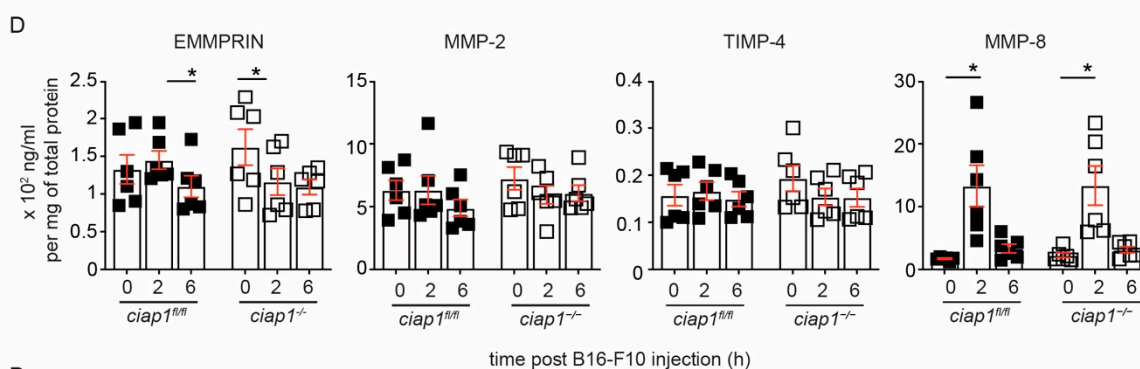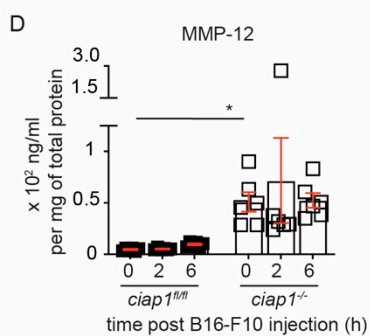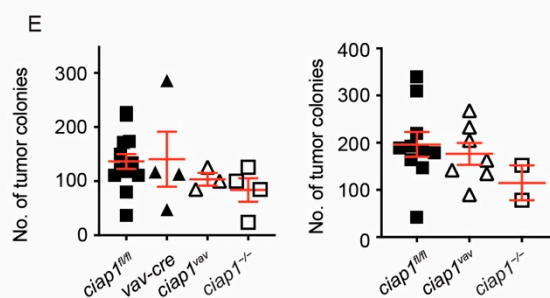

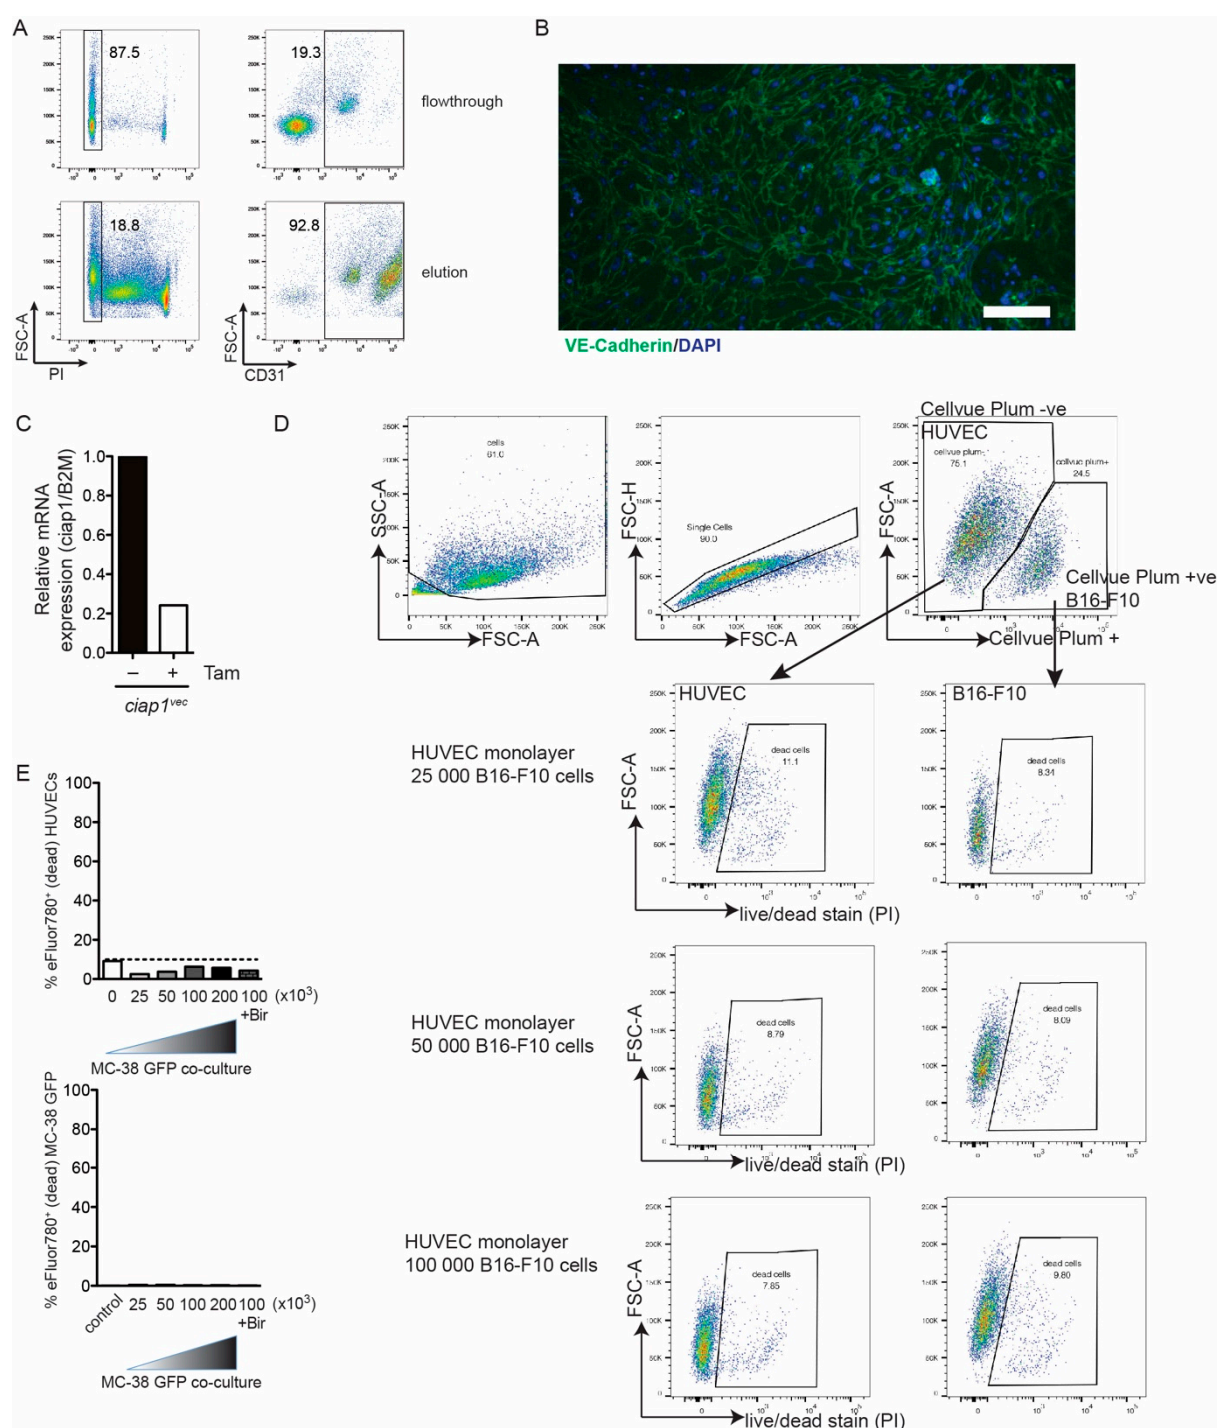

**Figure S4.** Isolation of primary endothelial cells (ECs), verification of *ciap1* loss by tamoxifen driven cre and analysis of cell death of MC-38 cells co-cultured with HUVEC monolayers.

(a) Primary isolated pulmonary ECs ( $CD31^+$ ) were analysed by flow cytometry following MACS separation. Cells from the elution, enriched in  $CD31^+$  cells, and flowthrough were stained with an anti-rat-FITC secondary antibody and propidium iodide (PI) to assay for live cells. Pre-gated on singlets. Representative FACS plots. (b) Immunofluorescence staining of primary isolated ECs with DAPI (blue) and primary antibody against VE-Cadherin (green). Representative picture. Scale bar: 100  $\mu$ m. (c) Relative quantification of *ciap1* expression levels by qPCR. Total RNA was isolated from lung primary endothelial cells of untreated or tamoxifen-fed (oral gavage, tam) *ciap1<sup>vec</sup>* mice to induce recombination. (d) Gating strategy for co-culture of HUVEC and tumor cells using a membrane dye (CellVue Plum) and fixable live/dead stain (Amcyan). Representative facs plots are shown for the co-culture with increasing ratio of HUVEC:tumor cells. (e) HUVEC monolayers were co-cultured with increasing numbers of MC-38 GFP cells, with or without Birinapant, for 24h. Cell death of HUVECs and tumor cells was assessed by fixable viability eFluor780 dye uptake using flow cytometry. 3 independent experiments. Data are presented as mean  $\pm$  SEM.

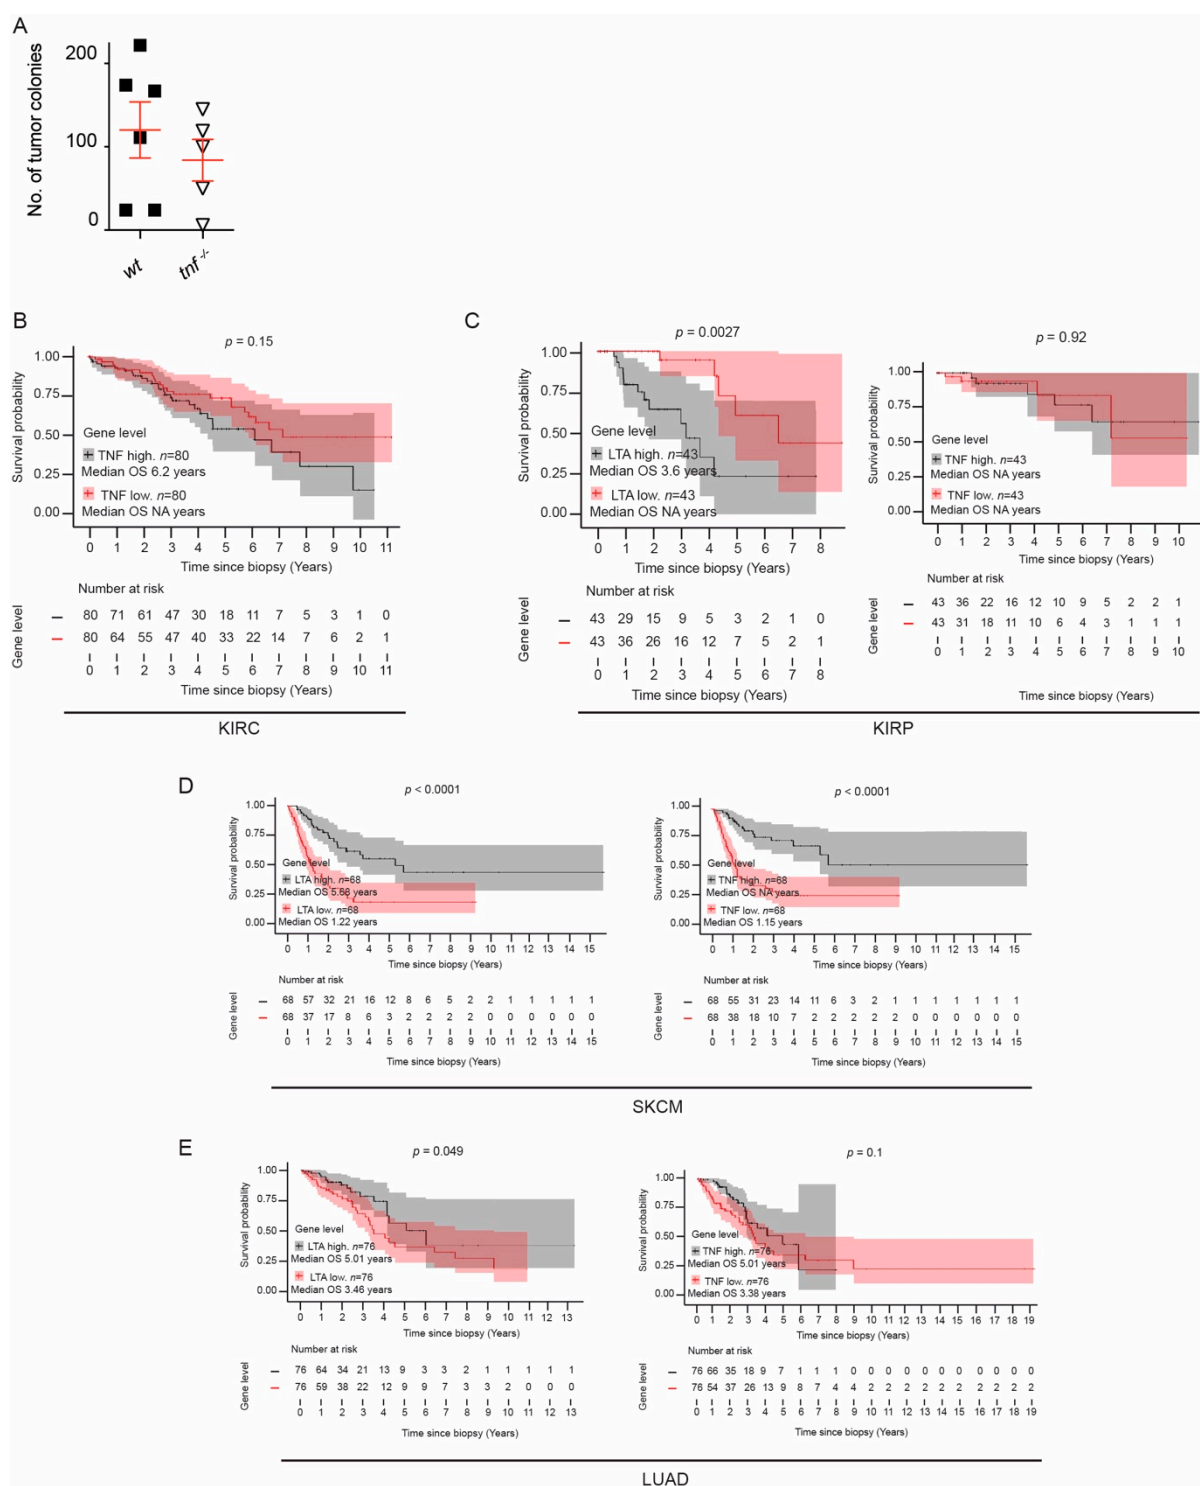

**Figure S5. Correlation between survival of cancer patients and expression levels of LTA and TNF.**

(a) Additional primary tumor nodule counts in wildtype and tnfr<sup>-/-</sup> mice challenged with B16-F10 tumor cells. (b-e) Survival curves of high (>85th percentile) versus low (<15th percentile) LTA and TNF mRNA expression in kidney renal clear cell carcinoma (KIRC), kidney renal papillary cell carcinoma (KIRP), skin cutaneous melanoma (SKCM) and lung adenocarcinoma (LUAD) from TCGA data.

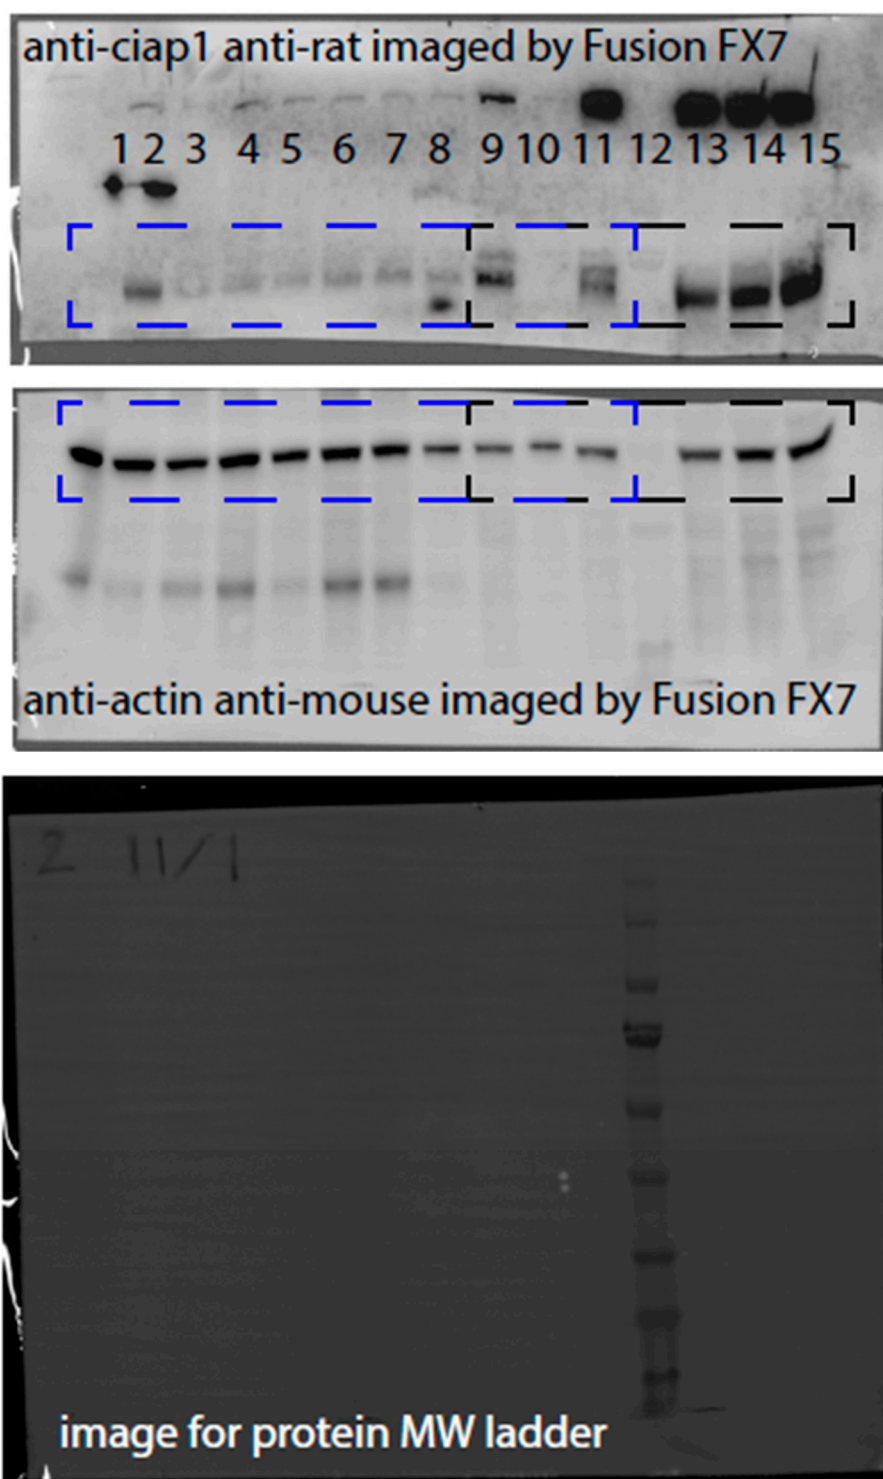



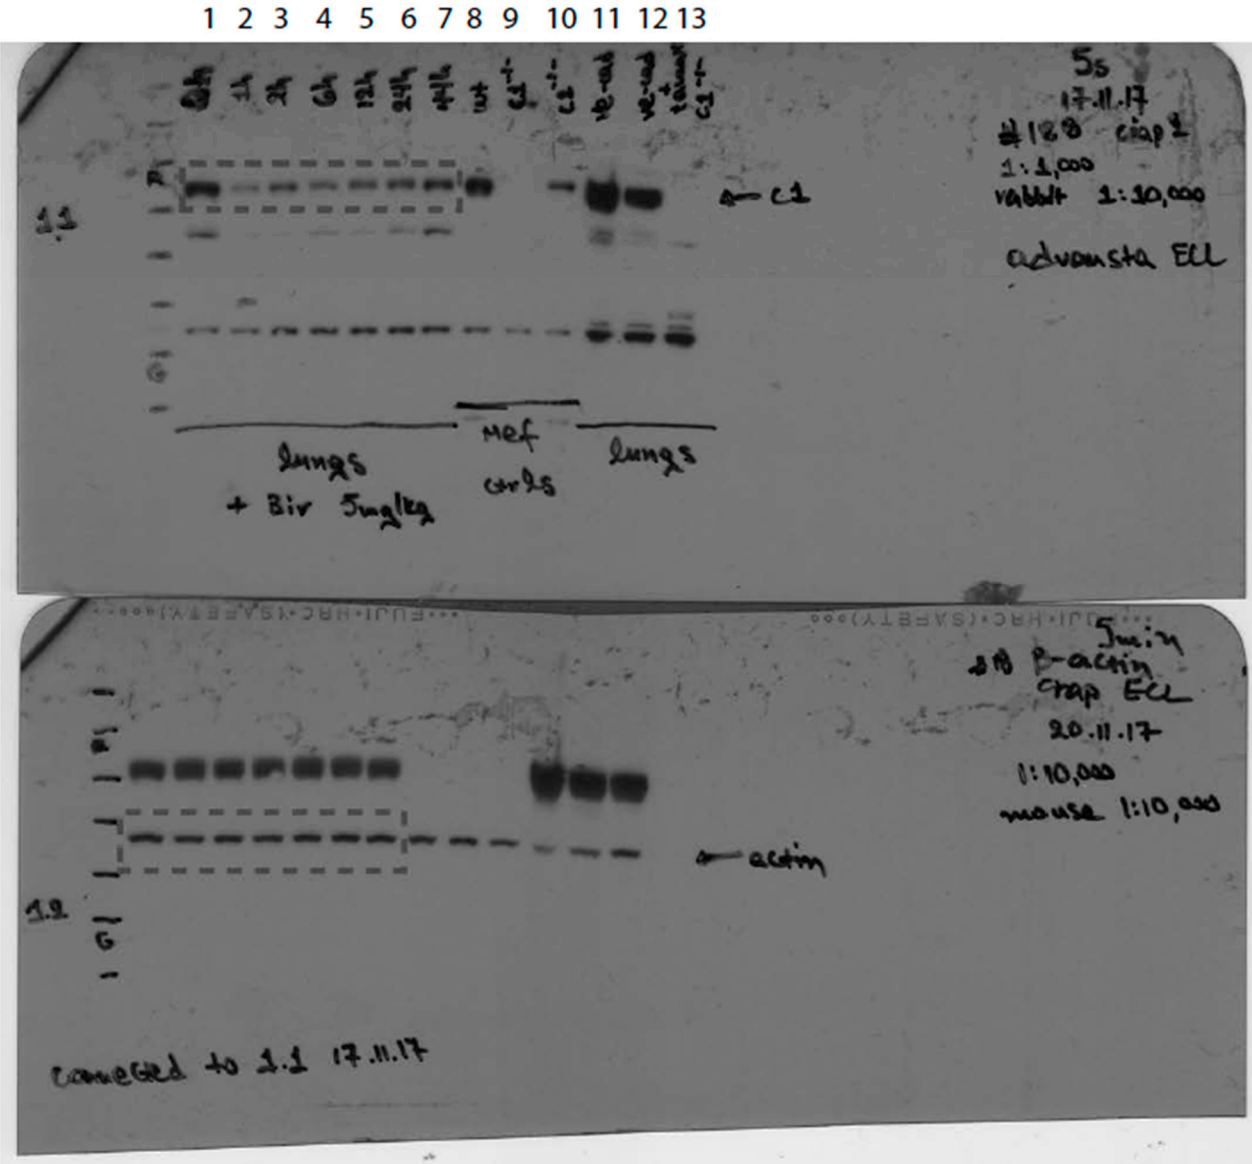



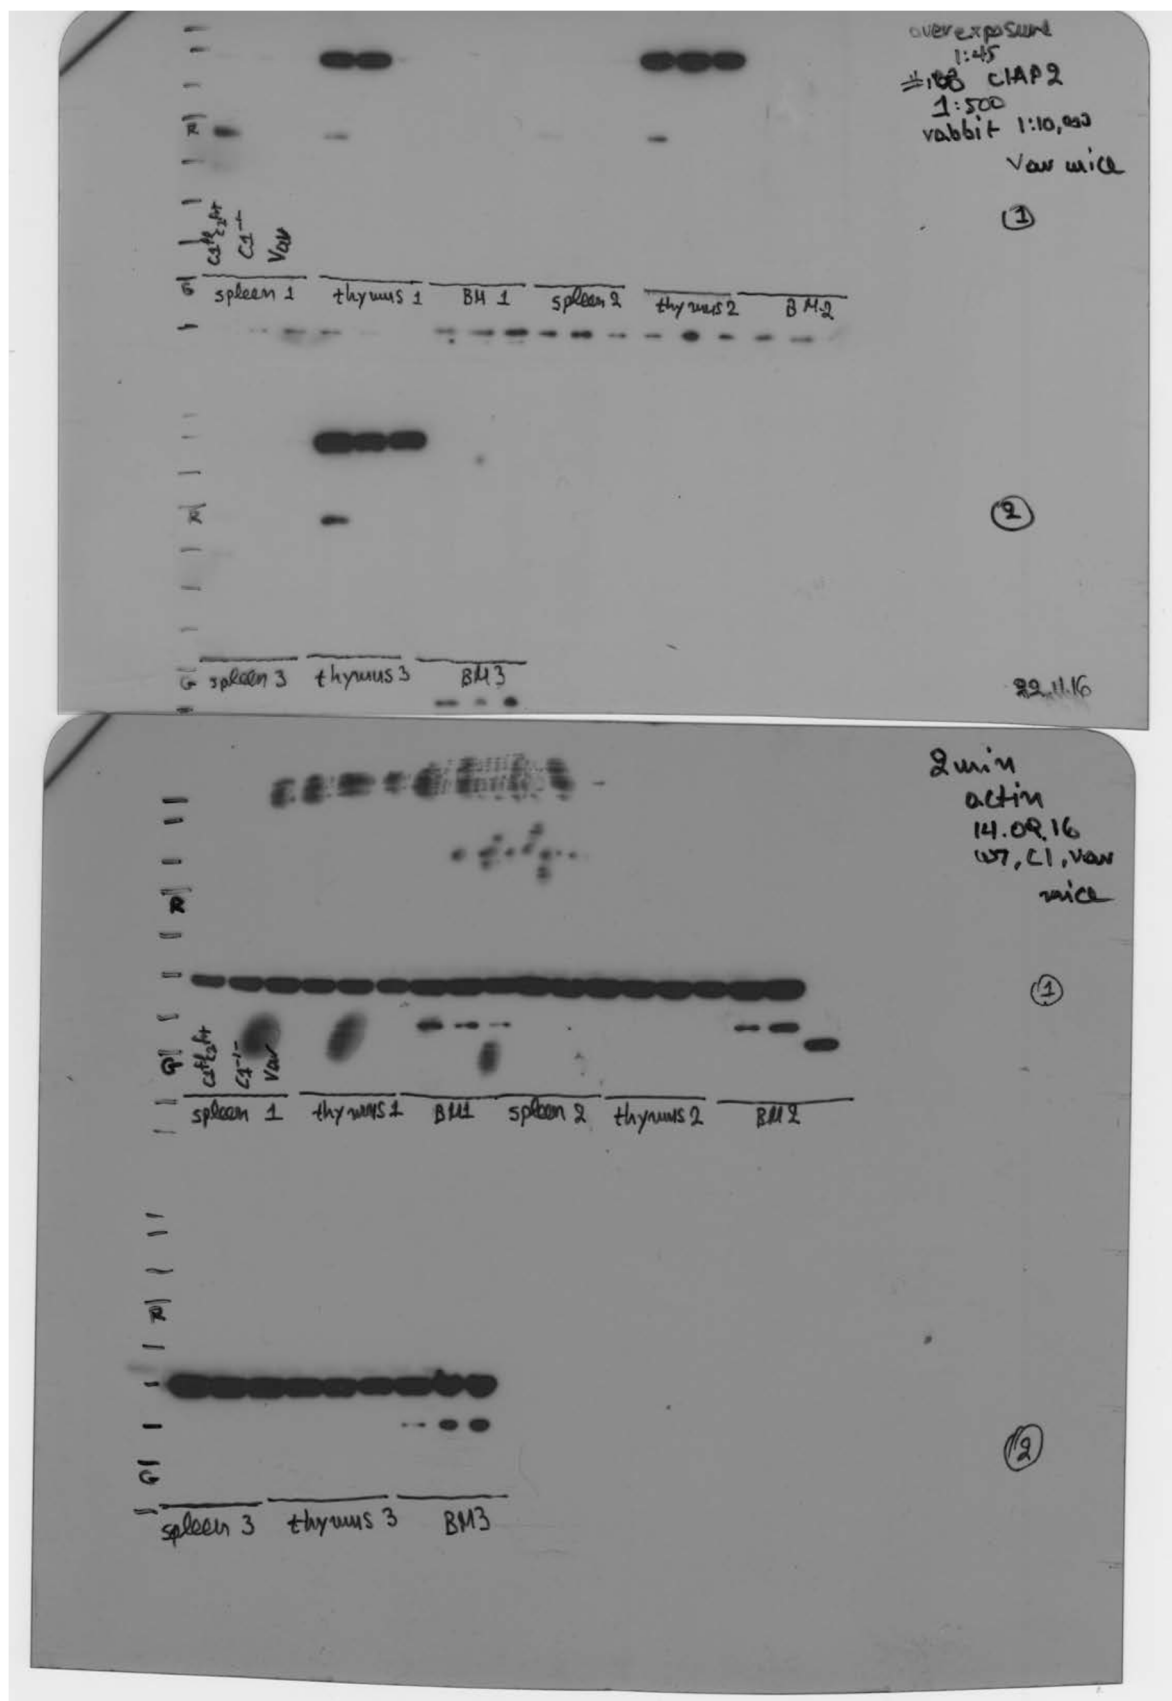

Figure S6. The uncropped Western blots.
